# Supplementary material for: A Carbon-Based Antifouling Nano-Biosensing Interface for Label-Free POCT of HbA1c
Source: Biosensors (Basel). 2021 Apr 12;11(4):118. doi: 10.3390/bios11040118 (PMC8069255; doi:10.3390/bios11040118)
Supplement: Supplementary file 1 [file biosensors-11-00118-s001.pdf]

# Supplementary Information

## A Carbon-Based Antifouling Nano-Biosensing Interface for Label-Free POCT of HbA1c

Zhenhua Li<sup>1,2</sup>, Jianyong Li<sup>1,2</sup>, Yanzhi Dou<sup>1,2</sup>, Lihua Wang<sup>3</sup>, Shiping Song<sup>3\*</sup>

<sup>1</sup>Division of Physical Biology, CAS Key Laboratory of Interfacial Physics and Technology, Shanghai Institute of Applied Physics, Chinese Academy of Sciences, Shanghai 201800, China

<sup>2</sup>University of Chinese Academy of Sciences, Beijing 100049, China

<sup>3</sup>The Interdisciplinary Research Center, Shanghai Synchrotron Radiation Facility, Zhangjiang Laboratory, Shanghai Advanced Research Institute, Chinese Academy of Sciences, Shanghai 201210, China

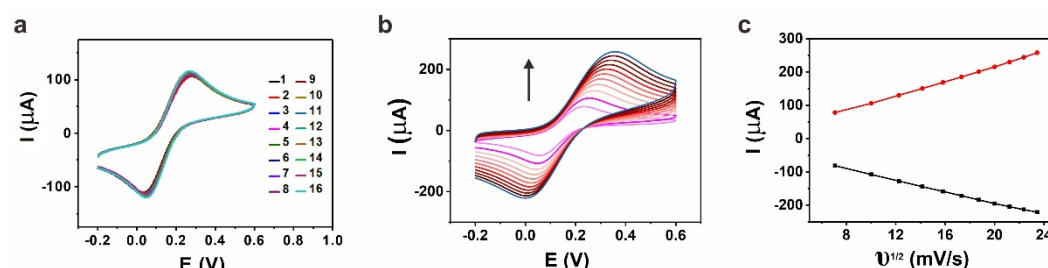

**Figure S1.** **a**, CV curves of 16-channel SPCE array. The number 1 to 16 represent 16 electrodes on the SPCE. **b**, CV curves of BSA/MWCNTs/GA layer of an equimolar solution of 5 mM ferri-/ferrocyanide at different scan rates 50-550 mV s<sup>-1</sup>. **c**, extracted oxidation/reduction peak current (*i<sub>p</sub>*) mean values from the CV shown in **b** plotted versus the square root of the scan rate. (*n* = 3 independent electrodes).

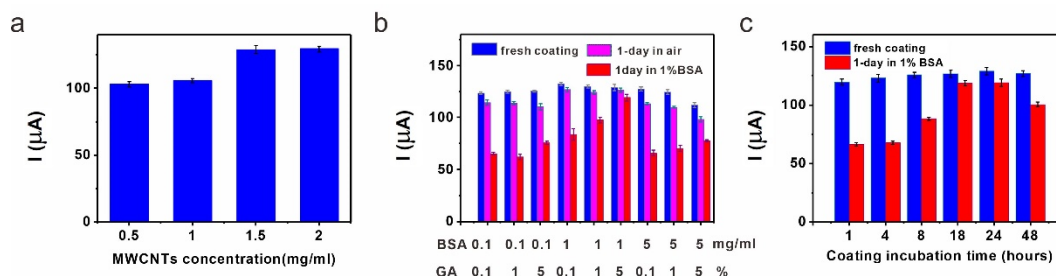

**Figure S2.** Optimization of the preparation of BSA/MWCNTs/GA layer in terms of **a**, MWCNTs concentration. **b**, BSA and GA ratio. **c**, incubation time. (*n* = 3, error bars represent the standard deviation of the mean).

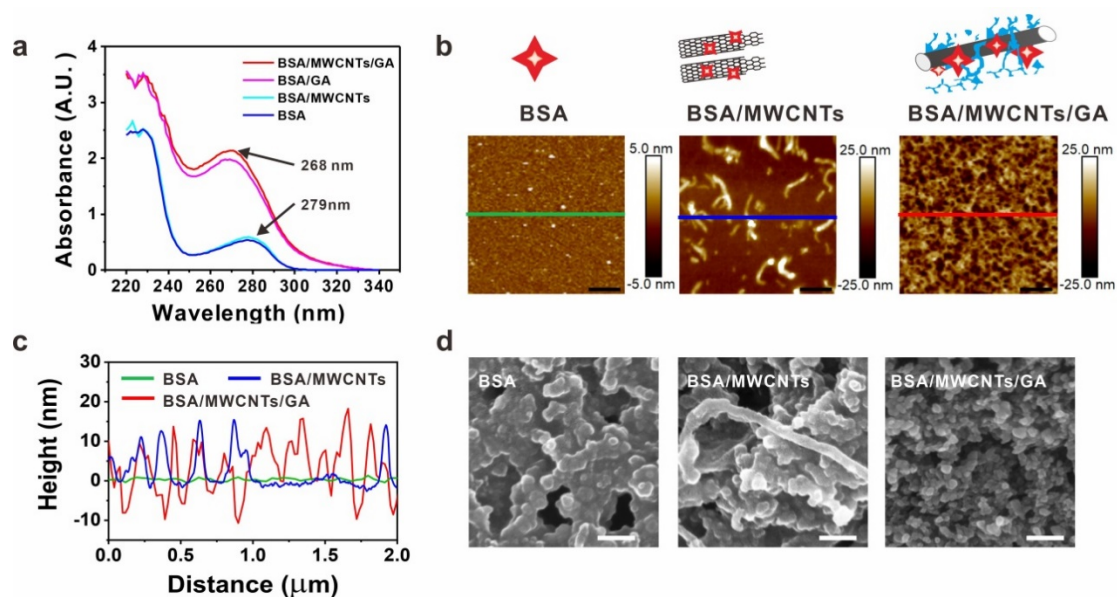

**Figure S3.** (a) UV-Vis absorption spectra of BSA, BSA/MWCNTs, BSA/GA and BSA/MWCNTs/GA ( $n = 3$ , only one UV-Vis absorption spectrum for each condition is shown). (b) AFM topographies of micas coated with BSA, BSA/MWCNTs and BSA/MWCNTs/GA (scale bar: 400 nm). This analysis was repeated twice on different samples. (c) Line profile based on BSA, BSA/MWCNTs and BSA/MWCNTs/GA coated micas. (d) SEM images of SPCEs coated with BSA, BSA/MWCNTs and BSA/MWCNTs/GA (scale bar: 100 nm). This analysis was repeated twice on different samples.

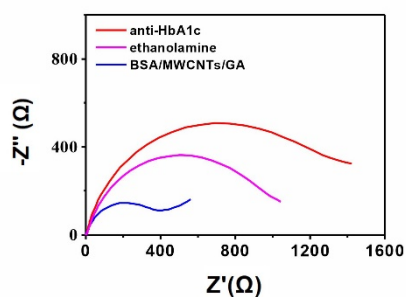

**Figure S4.** EIS curve of immobilization anti-HbA1c on BSA/MWCNTs/GA layer. ( $n = 3$  independent electrodes, only one Nyquist plot for each condition is shown).

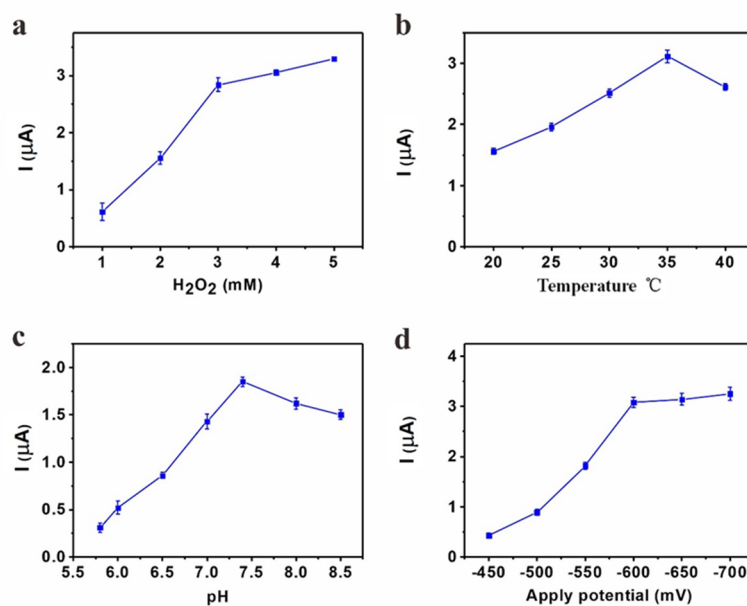

**Figure S5.** Optimization of the experiment parameters in terms of **a**, H<sub>2</sub>O<sub>2</sub> concentration. **b**, temperature. **c**, pH. **d**, applied potential for catalytic H<sub>2</sub>O<sub>2</sub> reduction. ( $n = 3$ , error bars represent the standard deviation of the mean).

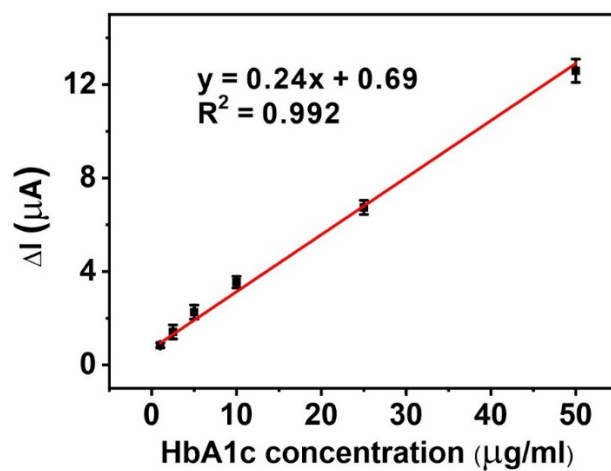

**Figure S6.** Calibration curves for detection of HbA1c for anti-HbA1c-BSA/MWCNTs/GA layer. ( $n = 3$ , error bars represent the standard deviation of the mean).
